# Supplementary material
Source: Springer Nature journal article supplement (https://www.springermedizin.de/resource/supplementary/12916_2003_9_MOESM1_ESM.pdf/9599054)

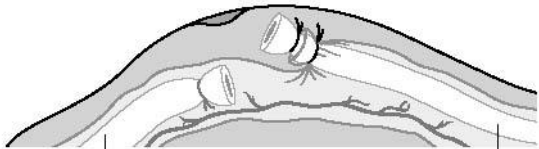

Testicular  
end

Prostatic  
end

Supplement: MOESM1 [file 9599054]
